# Supplementary material
Source: Springer Nature journal article supplement (https://www.springermedizin.de/resource/supplementary/12882_2013_761_MOESM2_ESM.pdf/9454656)

1 **Figure 2**

**A**

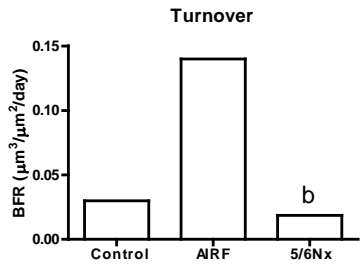

**B**

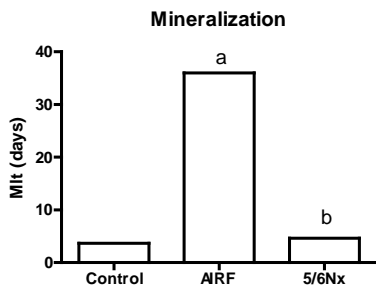

**C**

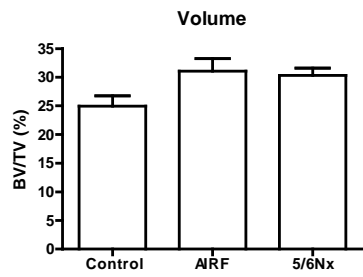

<sup>a</sup>  $p < 0.05$  vs. Control

<sup>b</sup>  $p < 0.05$  vs. AIRF

Supplement: MOESM2 [file 9454656]
